# Supplementary material
Source: PubMed Central journal article supplement (PMC2832973)

## Supplemental Data

**Supplemental 1.** (A) Excision of c-Jun induces a more spread morphology. (B) PCR analysis of *c-jun<sup>ff</sup>*-MEC transduced with either Ad-Cre or Ad-null demonstrates the production of a 600 base pair PCR-fragment in excised *c-jun<sup>ff</sup>*-MECs. (C) 2D and 3D culture of either wildtype MEC. Comparison of colony size of *c-jun<sup>+/+</sup>* vs. *c-jun<sup>-/-</sup>* (Cre-GFP) is shown as mean  $\pm$  SEM. Excision of *c-jun* reduces the diameter of colonies.

**Supplement 2. Excision of c-Jun reduces contact-independent growth.** (A) Cellular proliferation assays of mammary tumor derived cells determined by OD-450 or (B) Ki-67 FACS. (C) Ki-67 staining is shown for FACS as mean  $\pm$  SEM. (D) mRNA expression of stem cell markers in MET from *c-jun<sup>+/+</sup>* and *c-jun<sup>-/-</sup>* MET. (E) Luciferase reporter activity of the CCL5 and SCF promoters. Cells were treated with either AG825 (50  $\mu$ M) or SP600125 (5  $\mu$ M) for 24 hours. Data are mean  $\pm$  SEM for N=6 separate transfections.

**Supplement 3.** Quantitative analysis of cytokine array of conditioned medium (Supernatant) from equal numbers of mammary epithelial tumor cells comparing *c-jun<sup>+/+</sup>* and *c-jun<sup>-/-</sup>* cells. Data are representative of 2 separate experiments.

Supplement 1

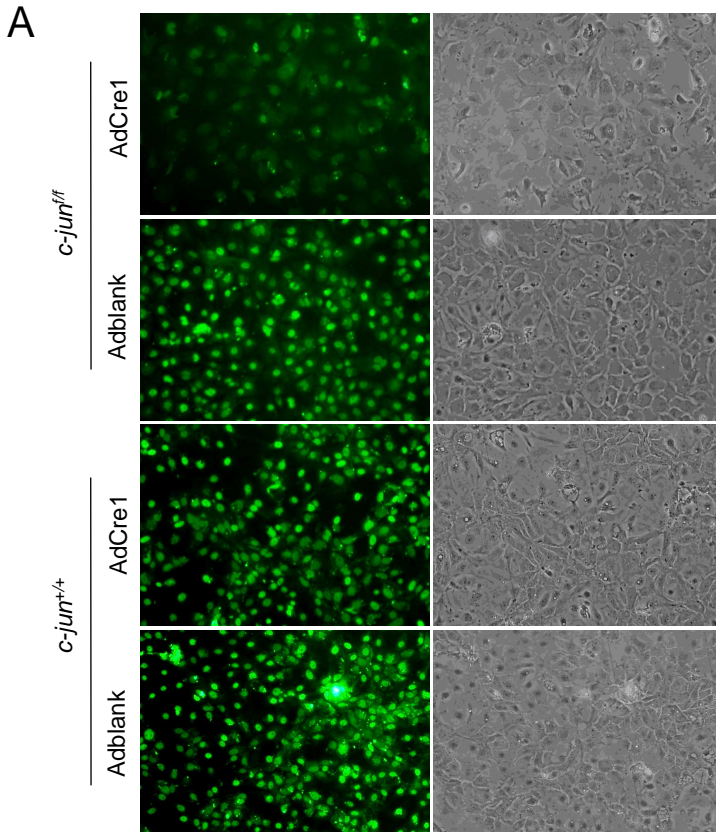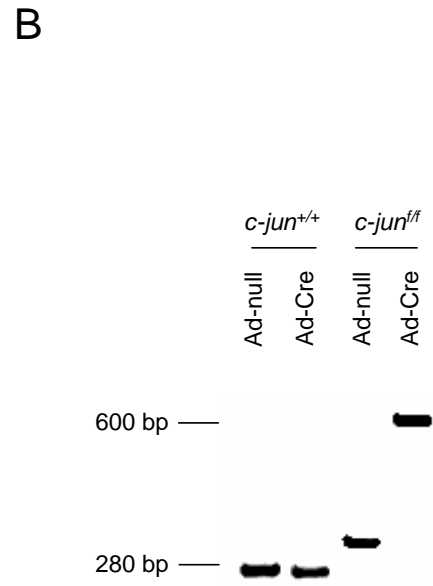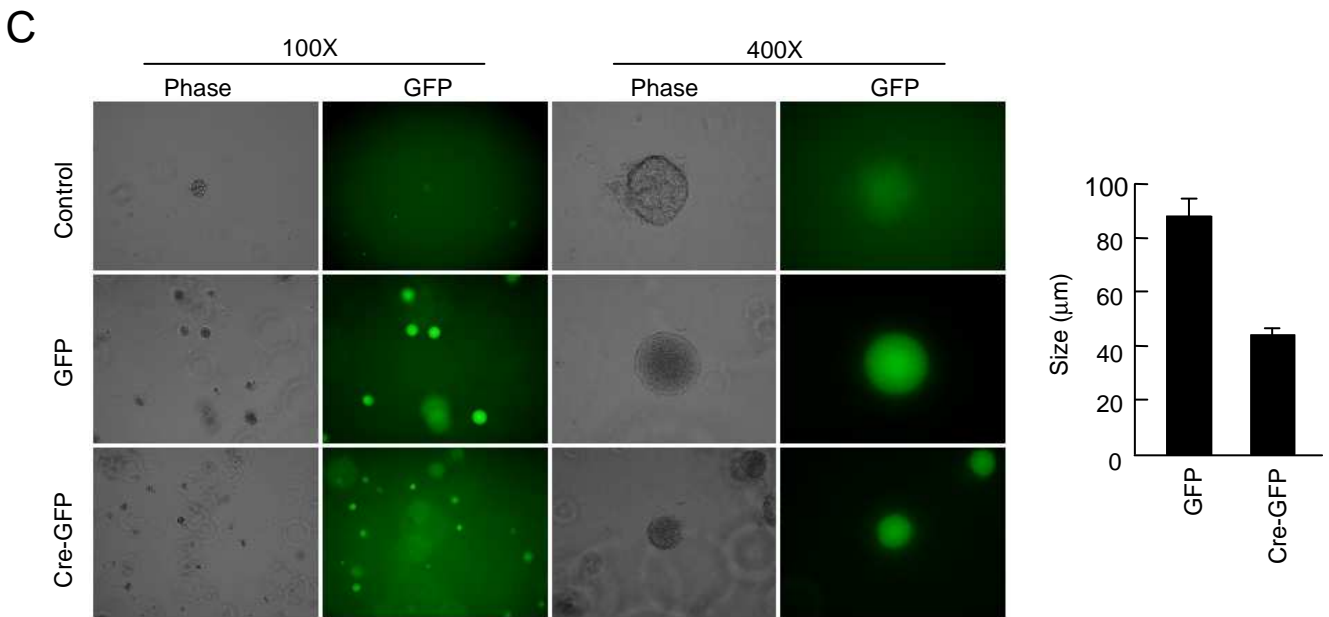

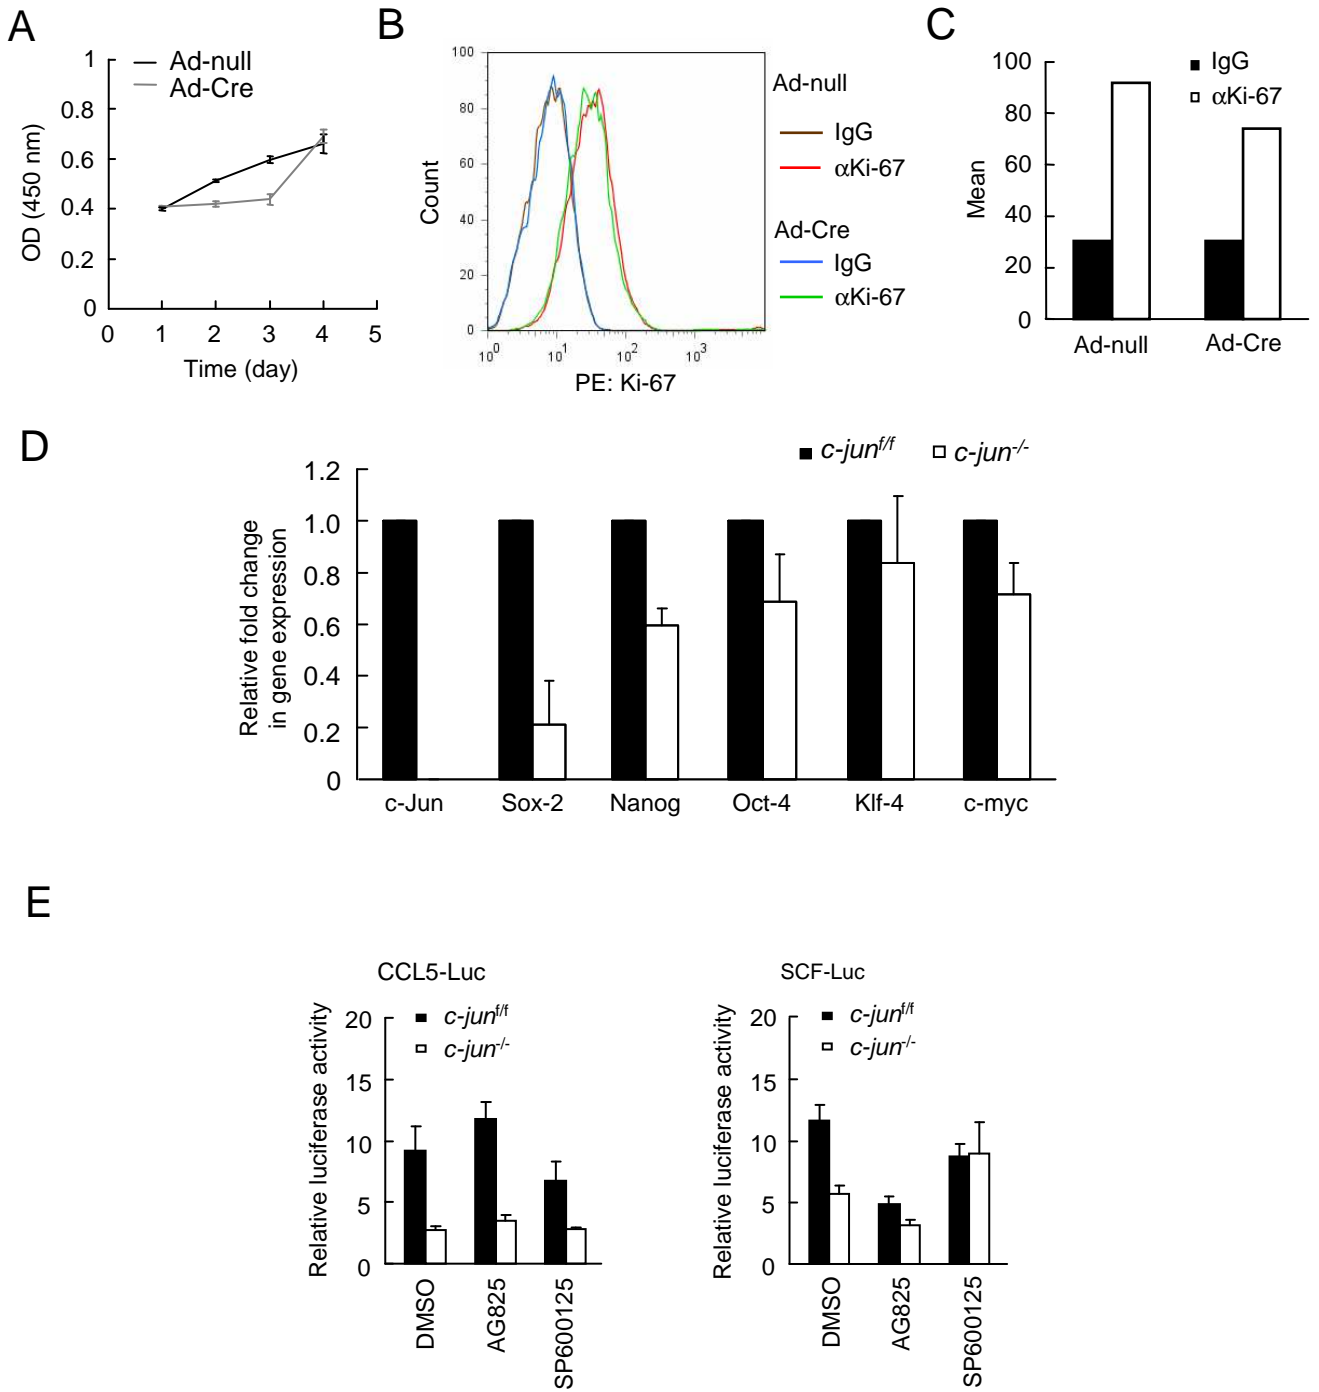

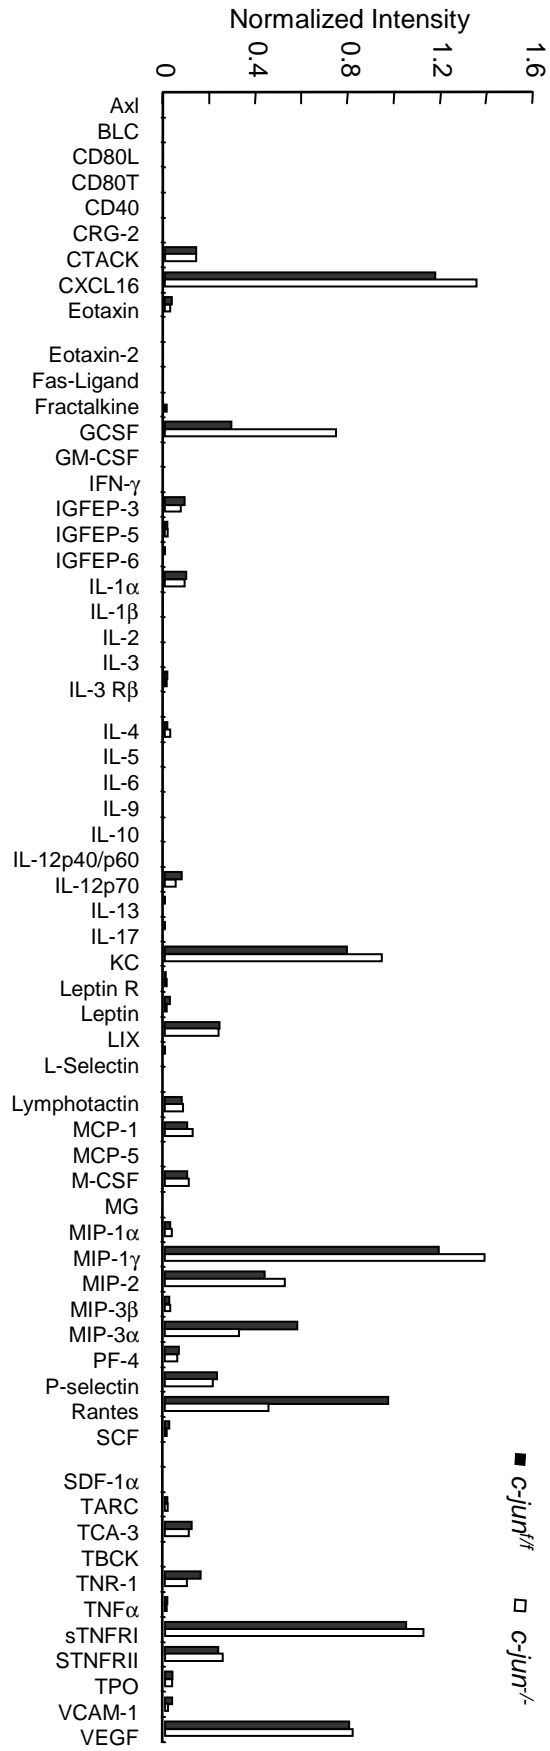

Supplement: supp_M110.100792_jbc.M110.100792-1.pdf [file supp_M110.100792_jbc.M110.100792-1.pdf]
